# Supplementary material
Source: bioRxiv or medRxiv preprint supplement (http://medrxiv.stage.highwire.org/highwire/filestream/94697/field_highwire_adjunct_files/0/2020.08.25.20181859-1.pdf)

Supplementary data: Proteomic signatures of perioperative oxygen delivery in skin after major surgery.

Gareth L. Ackland PhD FRCA FFICM,<sup>1</sup> Emily Bliss PhD,<sup>2</sup> Fatima Bahelil BSc,<sup>1</sup> Trinda Cyrus MSc,<sup>3</sup> Marilena Crescente,<sup>4</sup> Timothy Jones FRCS,<sup>1</sup> Sadaf Iqbal BSc,<sup>5</sup> Laura Gallego Paredes BSc,<sup>5</sup> Andrew J. Toner FRCA,<sup>6</sup> Wendy E. Heywood PhD,<sup>2</sup> Ana Gutierrez del Arroyo PhD,<sup>1</sup> Edel O'Toole PhD FRCP,<sup>7</sup> Kevin Mills PhD<sup>2</sup>

## 1. Contents

|                                                                                                                                                                                      |    |
|--------------------------------------------------------------------------------------------------------------------------------------------------------------------------------------|----|
| 2. Inclusion/exclusion criteria for POM-O RCT (ISRCTN76894700). .....                                                                                                                | 3  |
| 3. Adherence to ARRIVE guidelines. ....                                                                                                                                              | 4  |
| 5. Supplementary figure 1. Interactome for differentially expressed proteins after surgery..                                                                                         | 6  |
| 6. Supplementary figure 2. Biological processes as defined by GO pathway enrichment (false-discovery rate <0.01) involving differential expression of proteins after surgery. ....   | 7  |
| 7. Supplementary figure 3. Molecular functions (false-discovery rate <0.01) identified by GO molecular function enrichment for proteins differentially expressed after surgery. .... | 9  |
| 8. Supplementary figure 4. REACTOME pathways (false-discovery rate <0.01) identified enriched by proteins differentially expressed after surgery. ....                               | 10 |
| 9. Supplementary figure 5. Individual protein expression levels between achievers and non-achievers before and after surgery. ....                                                   | 11 |
| 10. Supplementary Figure 6. Summary data for MnSOD expression semi-quantified by immunoblot in postoperative skin biopsy samples. ....                                               | 12 |
| 11. Supplementary Figure 7: Heatmap for proteins altered after surgery in patients where preoperative DO2 was achieved. ....                                                         | 13 |
| 12. Supplementary Figure 8: Heatmap for proteins altered after surgery in patients where preoperative DO2 was not achieved. ....                                                     | 14 |
| 13. Supplementary Figure 9. IPA molecular pathologic pathways. ....                                                                                                                  | 15 |
| 14. Supplementary Figure 10. Example of uncropped immunoblot from mouse liver resection surgery model. ....                                                                          | 16 |
| 15. Supplementary Figure 11: IHC protocols for CD44 and ITAG6 .....                                                                                                                  | 17 |

## **2. Inclusion/exclusion criteria for POM-O RCT (ISRCTN76894700).**

### **Inclusion criteria:**

Surgery expected to last for at least 120 min were eligible for recruitment provided they satisfied the following high-risk criteria: American Society of Anesthesiologists classification of 3 or more; surgical procedures with an estimated or documented risk of postoperative morbidity (as defined by the Postoperative Morbidity Survey) exceeding 50%; modified Revised Cardiac Risk Score of 3 or more, as defined by age 70 years or more, a history of cardiovascular disease (myocardial infarction, coronary artery disease, cerebrovascular accident, electrocardiographic evidence for established cardiac pathology), cardiac failure, poor exercise capacity (anaerobic threshold  $<11$  mL/kg per min assessed by cardiopulmonary exercise testing or Duke Activity Status Index), renal impairment (serum creatinine  $\geq 130$   $\mu\text{mol/L}$ ), or diabetes.

### **Exclusion criteria:**

Refusal of consent, pregnancy, lithium therapy or allergy, recent myocardial ischaemia (within the previous 30 days), acute arrhythmia, acute bleeding, and patients receiving palliative treatment only.

### 3. Adherence to ARRIVE guidelines.

| ITEM                    |   | RECOMMENDATION                                                                                                                                                                                                                                                                                                                                                                                                                                                                                                                                                                                | Section/<br>Paragraph |
|-------------------------|---|-----------------------------------------------------------------------------------------------------------------------------------------------------------------------------------------------------------------------------------------------------------------------------------------------------------------------------------------------------------------------------------------------------------------------------------------------------------------------------------------------------------------------------------------------------------------------------------------------|-----------------------|
| Title                   | 1 | Provide as accurate and concise a description of the content of the article as possible.                                                                                                                                                                                                                                                                                                                                                                                                                                                                                                      | Page 1                |
| Abstract                | 2 | Provide an accurate summary of the background, research objectives, including details of the species or strain of animal used, key methods, principal findings and conclusions of the study.                                                                                                                                                                                                                                                                                                                                                                                                  | Page 2                |
| INTRODUCTION            |   |                                                                                                                                                                                                                                                                                                                                                                                                                                                                                                                                                                                               |                       |
| Background              | 3 | a. Include sufficient scientific background (including relevant references to previous work) to understand the motivation and context for the study, and explain the experimental approach and rationale.<br>b. Explain how and why the animal species and model being used can address the scientific objectives and, where appropriate, the study's relevance to human biology.                                                                                                                                                                                                             | Page 4                |
| Objectives              | 4 | Clearly describe the primary and any secondary objectives of the study, or specific hypotheses being tested.                                                                                                                                                                                                                                                                                                                                                                                                                                                                                  | Page 4-5              |
| METHODS                 |   |                                                                                                                                                                                                                                                                                                                                                                                                                                                                                                                                                                                               |                       |
| Ethical statement       | 5 | Indicate the nature of the ethical review permissions, relevant licences (e.g. Animal [Scientific Procedures] Act 1986), and national or institutional guidelines for the care and use of animals, that cover the research.                                                                                                                                                                                                                                                                                                                                                                   | Page 7                |
| Study design            | 6 | For each experiment, give brief details of the study design including:<br>a. The number of experimental and control groups.<br>b. Any steps taken to minimise the effects of subjective bias when allocating animals to treatment (e.g. randomisation procedure) and when assessing results (e.g. if done, describe who was blinded and when).<br>c. The experimental unit (e.g. a single animal, group or cage of animals).<br>A time-line diagram or flow chart can be useful to illustrate how complex study designs were carried out.                                                     | Page 7-10             |
| Experimental procedures | 7 | For each experiment and each experimental group, including controls, provide precise details of all procedures carried out. For example:<br>a. How (e.g. drug formulation and dose, site and route of administration, anaesthesia and analgesia used [including monitoring], surgical procedure, method of euthanasia). Provide details of any specialist equipment used, including supplier(s).<br>b. When (e.g. time of day).<br>c. Where (e.g. home cage, laboratory, water maze).<br>d. Why (e.g. rationale for choice of specific anaesthetic, route of administration, drug dose used). | Page 7-10             |

|                      |   |                                                                                                                                                                                                                                                                                                                                                                                                                                                                   |           |
|----------------------|---|-------------------------------------------------------------------------------------------------------------------------------------------------------------------------------------------------------------------------------------------------------------------------------------------------------------------------------------------------------------------------------------------------------------------------------------------------------------------|-----------|
| Experimental animals | 8 | <p>a. Provide details of the animals used, including species, strain, sex, developmental stage (e.g. mean or median age plus age range) and weight (e.g. mean or median weight plus weight range).</p> <p>b. Provide further relevant information such as the source of animals, international strain nomenclature, genetic modification status (e.g. knock-out or transgenic), genotype, health/immune status, drug or test naïve, previous procedures, etc.</p> | Page 7-10 |
|----------------------|---|-------------------------------------------------------------------------------------------------------------------------------------------------------------------------------------------------------------------------------------------------------------------------------------------------------------------------------------------------------------------------------------------------------------------------------------------------------------------|-----------|

number of nodes: 137 number of edges:425  
average node degree: 6.2 avg. local clustering coefficient:0.505  
expected number of edges: 181  
PPI enrichment p-value: < 1.0e-16

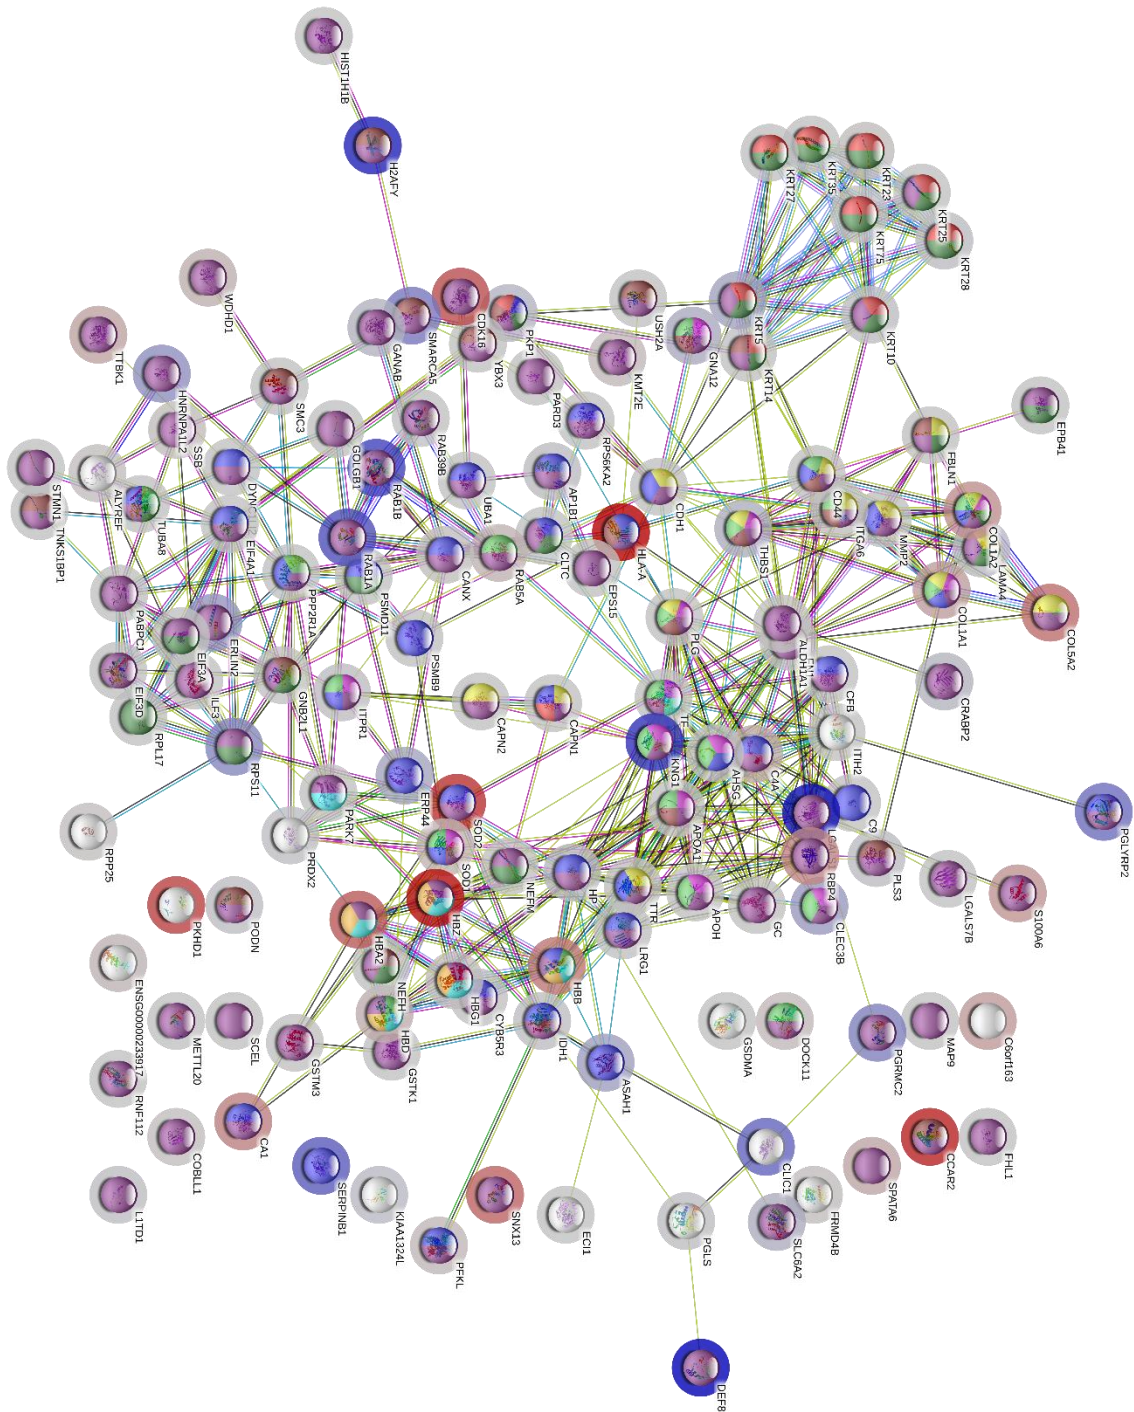

## 6. Supplementary figure 2. Biological processes as defined by GO pathway enrichment

(false-discovery rate <0.01) involving differential expression of proteins after

surgery.

| GO ID      | Description                                              | Observed | Total | FDR      |
|------------|----------------------------------------------------------|----------|-------|----------|
| GO:0006887 | exocytosis                                               | 26       | 774   | 7.12E-08 |
| GO:0032940 | secretion by cell                                        | 29       | 959   | 7.12E-08 |
| GO:0045055 | regulated exocytosis                                     | 25       | 691   | 7.12E-08 |
| GO:0016192 | vesicle-mediated transport                               | 37       | 1699  | 2.93E-07 |
| GO:0070268 | cornification                                            | 11       | 112   | 4.85E-07 |
| GO:0043588 | skin development                                         | 17       | 373   | 8.04E-07 |
| GO:0051234 | establishment of localization                            | 61       | 4248  | 9.87E-07 |
| GO:0009987 | cellular process                                         | 128      | 14652 | 5.43E-06 |
| GO:0006810 | transport                                                | 58       | 4130  | 6.09E-06 |
| GO:1990748 | cellular detoxification                                  | 9        | 90    | 8.09E-06 |
| GO:0044403 | symbiont process                                         | 20       | 650   | 1.01E-05 |
| GO:0002576 | platelet degranulation                                   | 10       | 129   | 1.09E-05 |
| GO:0009913 | epidermal cell differentiation                           | 14       | 306   | 1.09E-05 |
| GO:0044419 | interspecies interaction between organisms               | 21       | 724   | 1.09E-05 |
| GO:0009611 | response to wounding                                     | 18       | 547   | 1.37E-05 |
| GO:0051179 | localization                                             | 66       | 5233  | 1.37E-05 |
| GO:0002446 | neutrophil mediated immunity                             | 17       | 498   | 1.71E-05 |
| GO:0042119 | neutrophil activation                                    | 17       | 497   | 1.71E-05 |
| GO:0002443 | leukocyte mediated immunity                              | 19       | 632   | 1.77E-05 |
| GO:0002252 | immune effector process                                  | 23       | 927   | 2.08E-05 |
| GO:0043062 | extracellular structure organization                     | 14       | 339   | 2.20E-05 |
| GO:0007596 | blood coagulation                                        | 13       | 288   | 2.25E-05 |
| GO:0015671 | oxygen transport                                         | 5        | 15    | 2.30E-05 |
| GO:0008544 | epidermis development                                    | 15       | 403   | 2.34E-05 |
| GO:0030198 | extracellular matrix organization                        | 13       | 296   | 2.45E-05 |
| GO:0016043 | cellular component organization                          | 64       | 5163  | 2.75E-05 |
| GO:0098869 | cellular oxidant detoxification                          | 8        | 86    | 2.75E-05 |
| GO:0002366 | leukocyte activation involved in immune response         | 18       | 616   | 3.71E-05 |
| GO:0043312 | neutrophil degranulation                                 | 16       | 485   | 3.71E-05 |
| GO:0045110 | intermediate filament bundle assembly                    | 4        | 6     | 3.78E-05 |
| GO:0030216 | keratinocyte differentiation                             | 12       | 267   | 4.44E-05 |
| GO:0002376 | immune system process                                    | 38       | 2370  | 5.25E-05 |
| GO:0001775 | cell activation                                          | 23       | 1024  | 5.72E-05 |
| GO:0045104 | intermediate filament cytoskeleton organization          | 6        | 41    | 5.72E-05 |
| GO:0048518 | positive regulation of biological process                | 65       | 5459  | 6.24E-05 |
| GO:0050896 | response to stimulus                                     | 83       | 7824  | 6.24E-05 |
| GO:0045109 | intermediate filament organization                       | 5        | 22    | 6.26E-05 |
| GO:0042060 | wound healing                                            | 15       | 461   | 6.61E-05 |
| GO:0022607 | cellular component assembly                              | 37       | 2343  | 8.46E-05 |
| GO:0097237 | cellular response to toxic substance                     | 10       | 195   | 9.46E-05 |
| GO:0050878 | regulation of body fluid levels                          | 15       | 483   | 0.00011  |
| GO:0043687 | post-translational protein modification                  | 13       | 365   | 0.00013  |
| GO:0006950 | response to stress                                       | 45       | 3267  | 0.00017  |
| GO:0042743 | hydrogen peroxide metabolic process                      | 5        | 31    | 0.00024  |
| GO:0048519 | negative regulation of biological process                | 59       | 4953  | 0.00025  |
| GO:0030162 | regulation of proteolysis                                | 18       | 742   | 0.00027  |
| GO:0065008 | regulation of biological quality                         | 47       | 3559  | 0.00027  |
| GO:0000302 | response to reactive oxygen species                      | 9        | 189   | 0.00048  |
| GO:0048523 | negative regulation of cellular process                  | 54       | 4454  | 0.00048  |
| GO:0052547 | regulation of peptidase activity                         | 13       | 420   | 0.00049  |
| GO:0030855 | epithelial cell differentiation                          | 16       | 649   | 0.00071  |
| GO:0045321 | leukocyte activation                                     | 19       | 894   | 0.00082  |
| GO:0042542 | response to hydrogen peroxide                            | 7        | 112   | 0.00083  |
| GO:0065003 | protein-containing complex assembly                      | 26       | 1514  | 0.00083  |
| GO:0072376 | protein activation cascade                               | 6        | 74    | 0.00083  |
| GO:1902532 | negative regulation of intracellular signal transduction | 14       | 514   | 0.00083  |
| GO:0009636 | response to toxic substance                              | 13       | 468   | 0.0013   |
| GO:0016999 | antibiotic metabolic process                             | 7        | 124   | 0.0015   |
| GO:0032502 | developmental process                                    | 60       | 5401  | 0.0015   |
| GO:0043933 | protein-containing complex subunit organization          | 28       | 1770  | 0.0015   |
| GO:0048522 | positive regulation of cellular process                  | 56       | 4898  | 0.0015   |

|              |                                                                                          |                 |              |            |
|--------------|------------------------------------------------------------------------------------------|-----------------|--------------|------------|
| GO:0048585   | negative regulation of response to stimulus                                              | 25              | 1483         | 0.0015     |
| GO:0006749   | glutathione metabolic process                                                            | 5               | 52           | 0.0018     |
| GO:0006518   | peptide metabolic process                                                                | 13              | 497          | 0.0022     |
| <b>GO ID</b> | <b>Description</b>                                                                       | <b>Observed</b> | <b>Total</b> | <b>FDR</b> |
| GO:0010812   | negative regulation of cell-substrate adhesion                                           | 5               | 55           | 0.0022     |
| GO:0016032   | viral process                                                                            | 14              | 571          | 0.0022     |
| GO:0032501   | multicellular organismal process                                                         | 68              | 6507         | 0.0022     |
| GO:0051704   | multi-organism process                                                                   | 32              | 2222         | 0.0022     |
| GO:0010810   | regulation of cell-substrate adhesion                                                    | 8               | 189          | 0.0025     |
| GO:0008219   | cell death                                                                               | 20              | 1080         | 0.0026     |
| GO:0031329   | regulation of cellular catabolic process                                                 | 16              | 743          | 0.0027     |
| GO:0009056   | catabolic process                                                                        | 28              | 1859         | 0.003      |
| GO:0051918   | negative regulation of fibrinolysis                                                      | 3               | 10           | 0.003      |
| GO:0071230   | cellular response to amino acid stimulus                                                 | 5               | 60           | 0.003      |
| GO:0075522   | IRES-dependent viral translational initiation                                            | 3               | 10           | 0.003      |
| GO:0097435   | supramolecular fiber organization                                                        | 11              | 383          | 0.0032     |
| GO:0072593   | reactive oxygen species metabolic process                                                | 6               | 103          | 0.0037     |
| GO:0007275   | multicellular organism development                                                       | 53              | 4726         | 0.0038     |
| GO:0051128   | regulation of cellular component organization                                            | 32              | 2306         | 0.0038     |
| GO:0052548   | regulation of endopeptidase activity                                                     | 11              | 393          | 0.0039     |
| GO:0006898   | receptor-mediated endocytosis                                                            | 8               | 209          | 0.0043     |
| GO:0012501   | programmed cell death                                                                    | 19              | 1042         | 0.0043     |
| GO:0030155   | regulation of cell adhesion                                                              | 14              | 623          | 0.0043     |
| GO:0031581   | hemidesmosome assembly                                                                   | 3               | 12           | 0.0043     |
| GO:0050789   | regulation of biological process                                                         | 99              | 11116        | 0.0043     |
| GO:0065007   | biological regulation                                                                    | 103             | 11740        | 0.0043     |
| GO:0030154   | cell differentiation                                                                     | 42              | 3457         | 0.0046     |
| GO:0051246   | regulation of protein metabolic process                                                  | 35              | 2668         | 0.0046     |
| GO:0051336   | regulation of hydrolase activity                                                         | 21              | 1238         | 0.0046     |
| GO:2001242   | regulation of intrinsic apoptotic signaling pathway                                      | 7               | 159          | 0.0046     |
| GO:0019430   | removal of superoxide radicals                                                           | 3               | 13           | 0.0048     |
| GO:0043086   | negative regulation of catalytic activity                                                | 16              | 809          | 0.0055     |
| GO:0044248   | cellular catabolic process                                                               | 25              | 1646         | 0.0055     |
| GO:0048513   | animal organ development                                                                 | 37              | 2926         | 0.0055     |
| GO:0010035   | response to inorganic substance                                                          | 12              | 491          | 0.0056     |
| GO:0042493   | response to drug                                                                         | 17              | 900          | 0.0056     |
| GO:0043603   | cellular amide metabolic process                                                         | 15              | 732          | 0.0057     |
| GO:0048856   | anatomical structure development                                                         | 55              | 5085         | 0.0057     |
| GO:0006955   | immune response                                                                          | 24              | 1560         | 0.0058     |
| GO:0007044   | cell-substrate junction assembly                                                         | 4               | 40           | 0.0062     |
| GO:0032879   | regulation of localization                                                               | 33              | 2524         | 0.0067     |
| GO:0048731   | system development                                                                       | 47              | 4144         | 0.0068     |
| GO:0001732   | formation of cytoplasmic translation initiation complex                                  | 2               | 2            | 0.0069     |
| GO:0052047   | interaction with other organism via secreted substance involved in symbiotic interaction | 2               | 2            | 0.0069     |
| GO:1904237   | positive regulation of substrate-dependent cell migration, cell attachment to substrate  | 2               | 2            | 0.0069     |
| GO:0080134   | regulation of response to stress                                                         | 21              | 1299         | 0.0072     |
| GO:0051291   | protein heterooligomerization                                                            | 6               | 126          | 0.0075     |
| GO:0044092   | negative regulation of molecular function                                                | 19              | 1119         | 0.0077     |
| GO:0006979   | response to oxidative stress                                                             | 10              | 373          | 0.008      |
| GO:0070887   | cellular response to chemical stimulus                                                   | 34              | 2672         | 0.008      |
| GO:0010951   | negative regulation of endopeptidase activity                                            | 8               | 242          | 0.0082     |
| GO:1902882   | regulation of response to oxidative stress                                               | 5               | 83           | 0.0083     |
| GO:0007162   | negative regulation of cell adhesion                                                     | 8               | 245          | 0.0088     |



**7. Supplementary figure 3. Molecular functions (false-discovery rate <0.01) identified by GO molecular function enrichment for proteins differentially expressed after surgery.**

| <b>GO-term</b> | <b>Description</b>                     | <b>Count in gene set</b> | <b>FDR</b> |
|----------------|----------------------------------------|--------------------------|------------|
| GO:0005198     | structural molecule activity           | 23 of 679                | 3.05E-07   |
| GO:0140104     | molecular carrier activity             | 7 of 40                  | 8.95E-06   |
| GO:0005344     | oxygen carrier activity                | 5 of 14                  | 2.89E-05   |
| GO:0005488     | binding                                | 111 of 11878             | 3.88E-05   |
| GO:0044877     | protein-containing complex binding     | 22 of 968                | 0.00014    |
| GO:0005515     | protein binding                        | 73 of 6605               | 0.0002     |
| GO:0019825     | oxygen binding                         | 5 of 36                  | 0.0007     |
| GO:0016209     | antioxidant activity                   | 6 of 79                  | 0.0019     |
| GO:0005518     | collagen binding                       | 5 of 61                  | 0.0057     |
| GO:0005200     | structural constituent of cytoskeleton | 6 of 106                 | 0.0071     |
| GO:0061134     | peptidase regulator activity           | 8 of 211                 | 0.0073     |

## 8. Supplementary figure 4. REACTOME pathways (false-discovery rate <0.01)

identified enriched by proteins differentially expressed after surgery.

| REACTOME ID | Term                                                                                                                        | observed | background count | FDR      |
|-------------|-----------------------------------------------------------------------------------------------------------------------------|----------|------------------|----------|
| HSA-109582  | Hemostasis                                                                                                                  | 21       | 601              | 1.23E-06 |
| HSA-168256  | Immune System                                                                                                               | 38       | 1925             | 1.23E-06 |
| HSA-6809371 | Formation of the cornified envelope                                                                                         | 11       | 128              | 1.23E-06 |
| HSA-1474244 | Extracellular matrix organization                                                                                           | 14       | 298              | 5.74E-06 |
| HSA-76002   | Platelet activation, signaling and aggregation                                                                              | 13       | 256              | 6.08E-06 |
| HSA-114608  | Platelet degranulation                                                                                                      | 9        | 125              | 3.34E-05 |
| HSA-3000171 | Non-integrin membrane-ECM interactions                                                                                      | 7        | 58               | 3.34E-05 |
| HSA-381426  | Regulation of Insulin-like Growth Factor (IGF) transport and uptake by Insulin-like Growth Factor Binding Proteins (IGFBPs) | 9        | 123              | 3.34E-05 |
| HSA-168249  | Innate Immune System                                                                                                        | 23       | 1012             | 3.91E-05 |
| HSA-1474228 | Degradation of the extracellular matrix                                                                                     | 9        | 139              | 4.71E-05 |
| HSA-392499  | Metabolism of proteins                                                                                                      | 33       | 1948             | 6.86E-05 |
| HSA-6798695 | Neutrophil degranulation                                                                                                    | 15       | 471              | 6.86E-05 |
| HSA-3000170 | Syndecan interactions                                                                                                       | 5        | 26               | 8.85E-05 |
| HSA-216083  | Integrin cell surface interactions                                                                                          | 7        | 83               | 0.00012  |
| HSA-1266738 | Developmental Biology                                                                                                       | 21       | 1023             | 0.00038  |
| HSA-2173782 | Binding and Uptake of Ligands by Scavenger Receptors                                                                        | 5        | 40               | 0.00047  |
| HSA-5653656 | Vesicle-mediated transport                                                                                                  | 16       | 649              | 0.00047  |
| HSA-8957275 | Post-translational protein phosphorylation                                                                                  | 7        | 106              | 0.00047  |
| HSA-1643685 | Disease                                                                                                                     | 20       | 1018             | 0.00085  |
| HSA-597592  | Post-translational protein modification                                                                                     | 24       | 1366             | 0.00085  |
| HSA-8862803 | Deregulated CDK5 triggers multiple neurodegenerative pathways in Alzheimer's disease models                                 | 4        | 22               | 0.00085  |
| HSA-72649   | Translation initiation complex formation                                                                                    | 5        | 55               | 0.0015   |
| HSA-8874081 | MET activates PTK2 signaling                                                                                                | 4        | 29               | 0.0017   |
| HSA-446107  | Type I hemidesmosome assembly                                                                                               | 3        | 11               | 0.0024   |
| HSA-156827  | L13a-mediated translational silencing of Ceruloplasmin expression                                                           | 6        | 107              | 0.0029   |
| HSA-2168880 | Scavenging of heme from plasma                                                                                              | 3        | 13               | 0.0034   |
| HSA-72737   | Cap-dependent Translation Initiation                                                                                        | 6        | 115              | 0.0039   |
| HSA-6806834 | Signaling by MET                                                                                                            | 5        | 76               | 0.0045   |
| HSA-9006934 | Signaling by Receptor Tyrosine Kinases                                                                                      | 11       | 437              | 0.0052   |
| HSA-3000480 | Scavenging by Class A Receptors                                                                                             | 3        | 18               | 0.0066   |
| HSA-2262752 | Cellular responses to stress                                                                                                | 10       | 384              | 0.0071   |
| HSA-446728  | Cell junction organization                                                                                                  | 5        | 91               | 0.0088   |

## 9. Supplementary figure 5. Individual protein expression levels between achievers and non-achievers before and after surgery.

Bars represent median values.

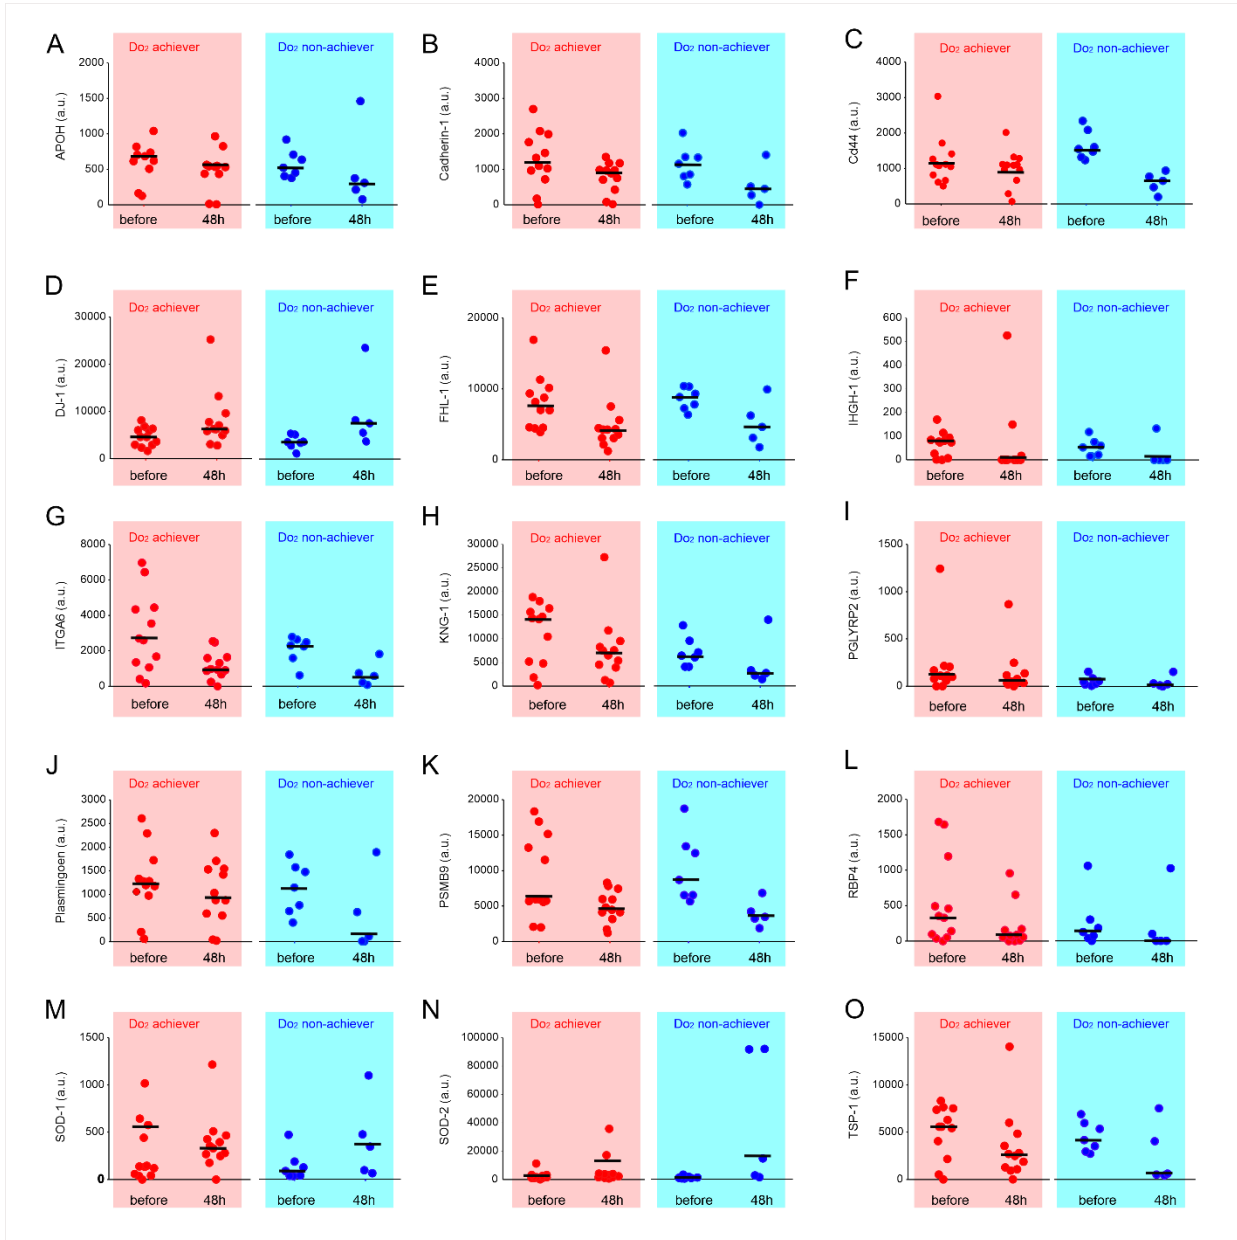

**10. Supplementary Figure 6. Summary box-plot data for MnSOD expression semi-quantified by immunoblot in postoperative skin biopsy samples.**

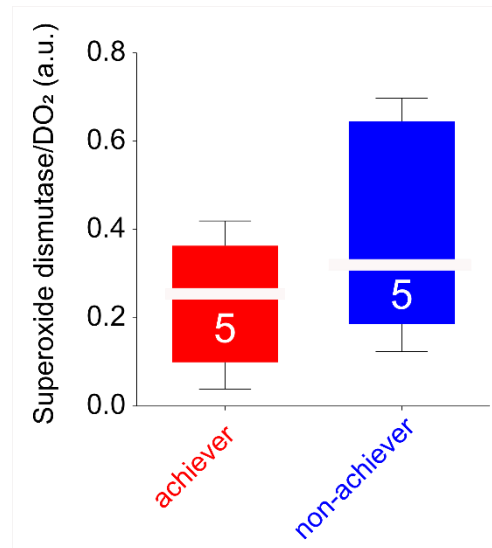

11. Supplementary Figure 7: Heatmap for proteins altered after surgery in patients where preoperative DO2 was achieved.

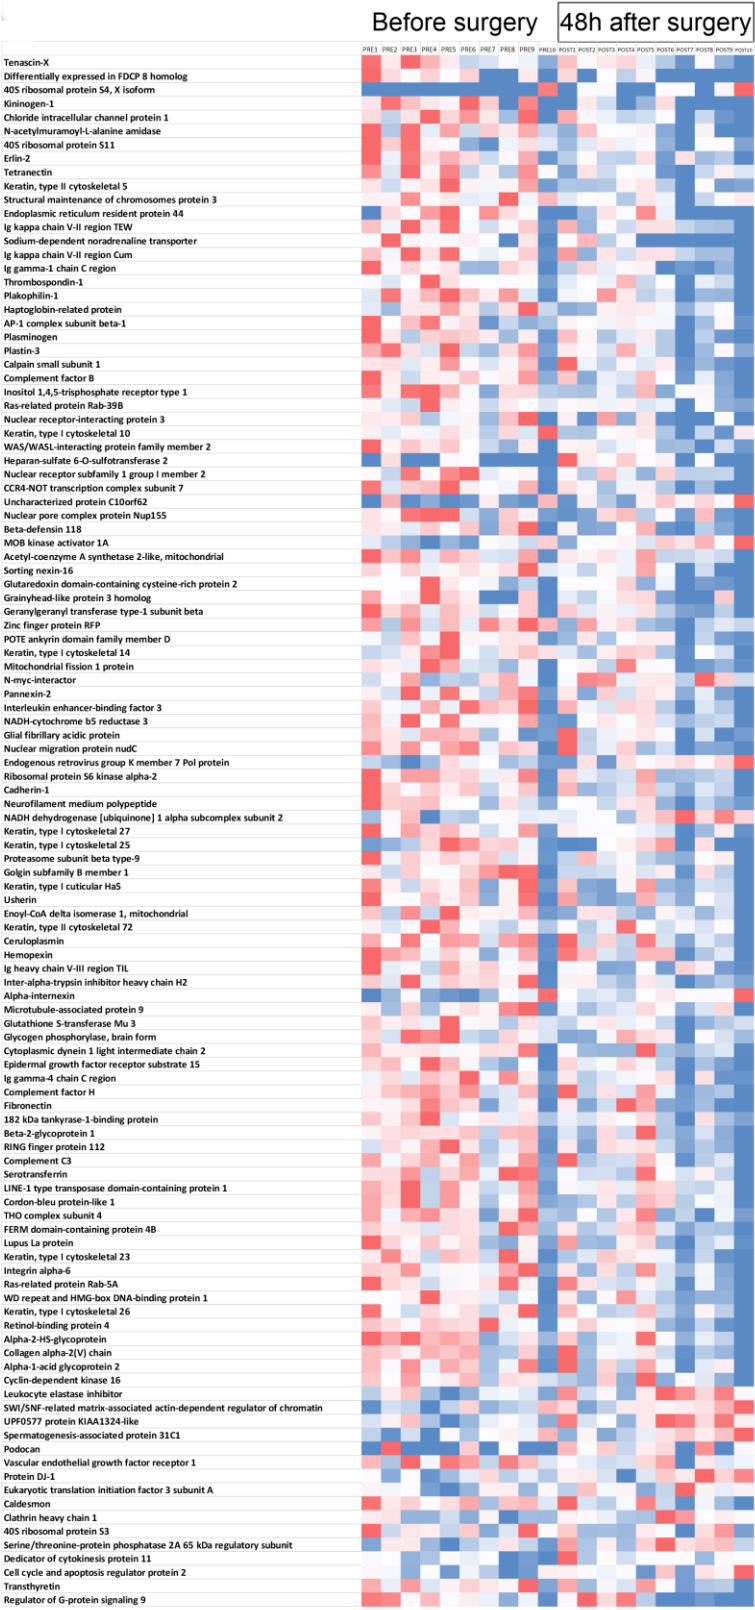

# 12. Supplementary Figure 8: Heatmap for proteins altered after surgery in patients

where preoperative DO2

was not achieved.

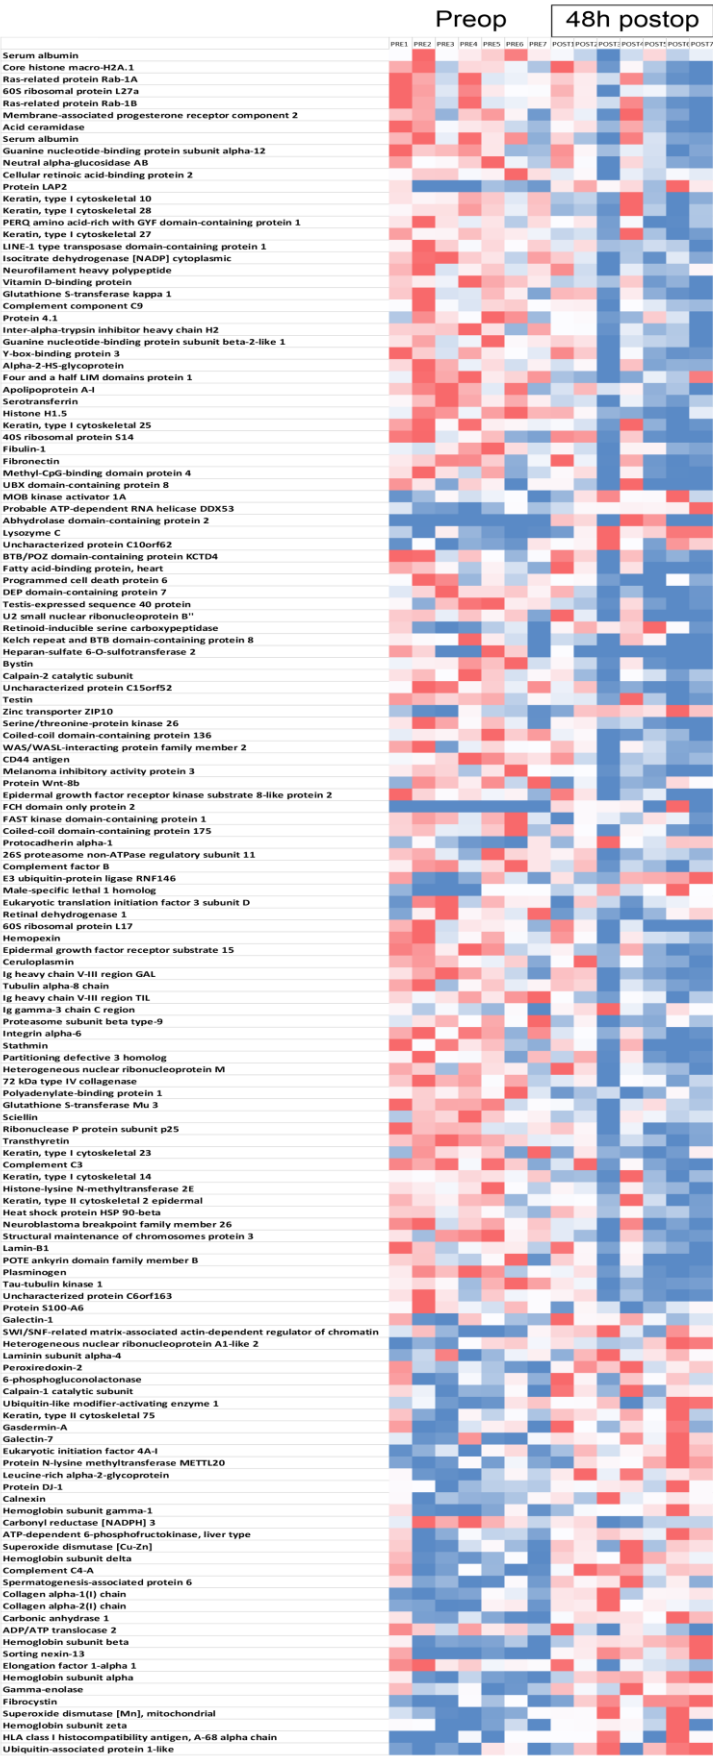

### 13. Supplementary Figure 9. IPA molecular pathologic pathways.

Blank entry indicates no enrichment DO<sub>2</sub> achiever group was found on IPA analysis. Other significant pathways are shown in main text.

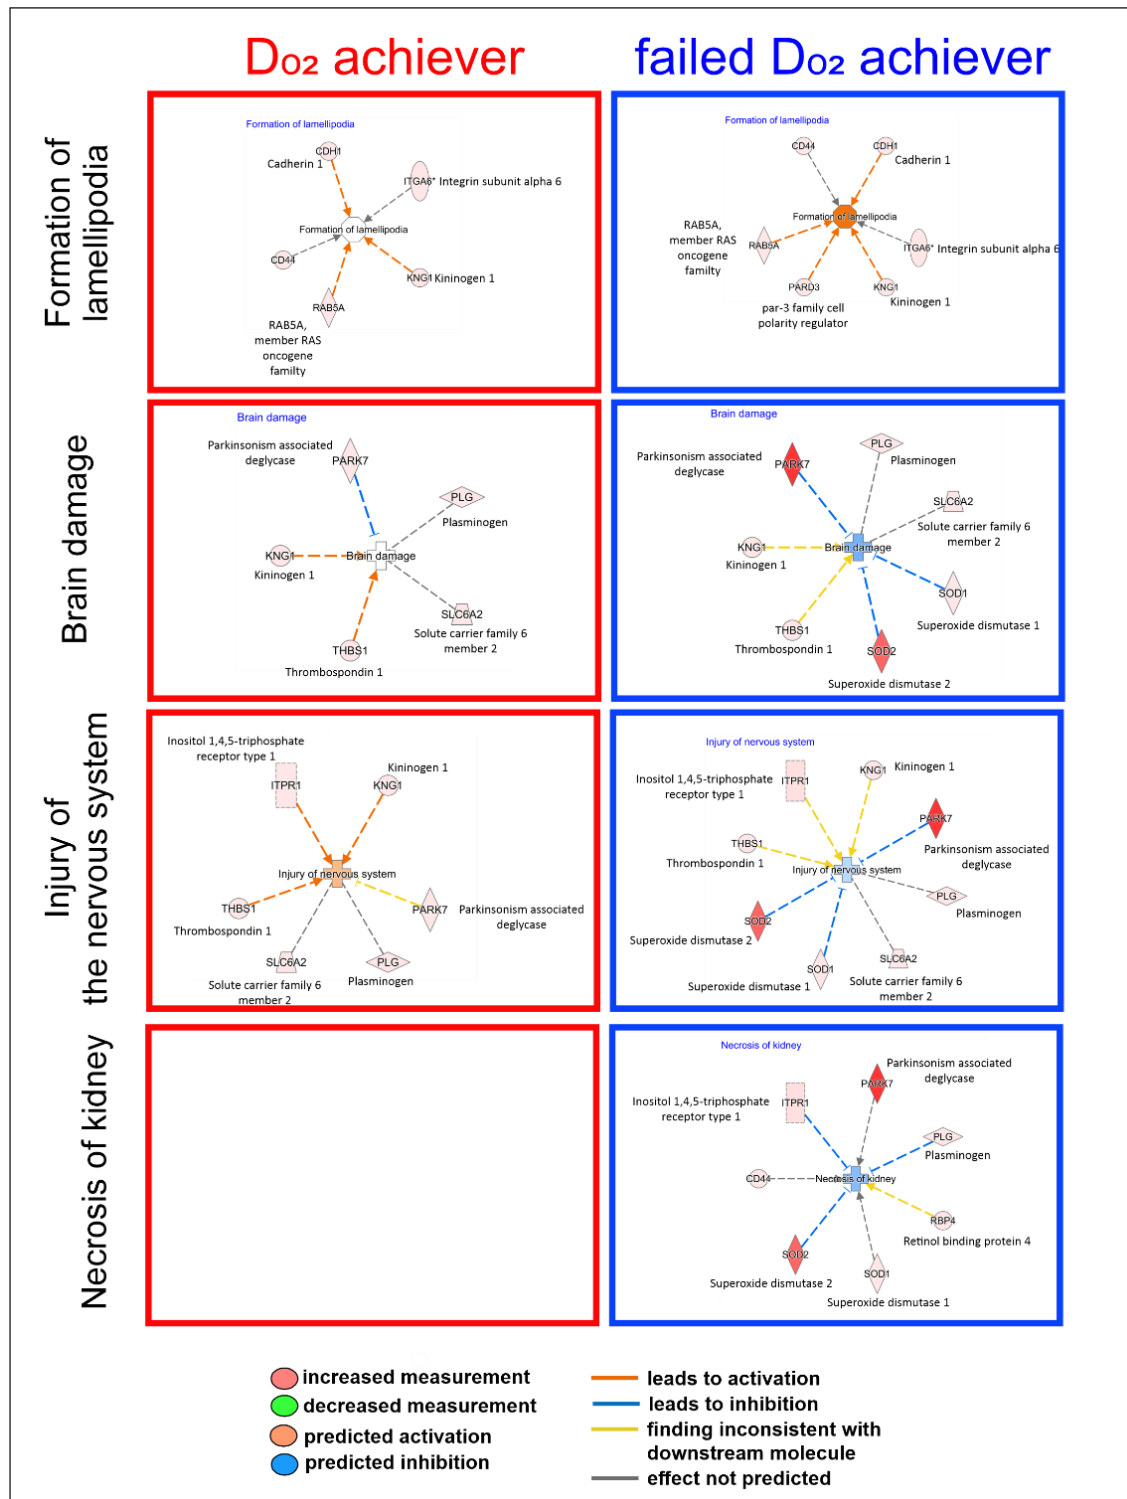

14. Supplementary Figure 10. Example of uncropped immunoblot from mouse liver resection surgery model.

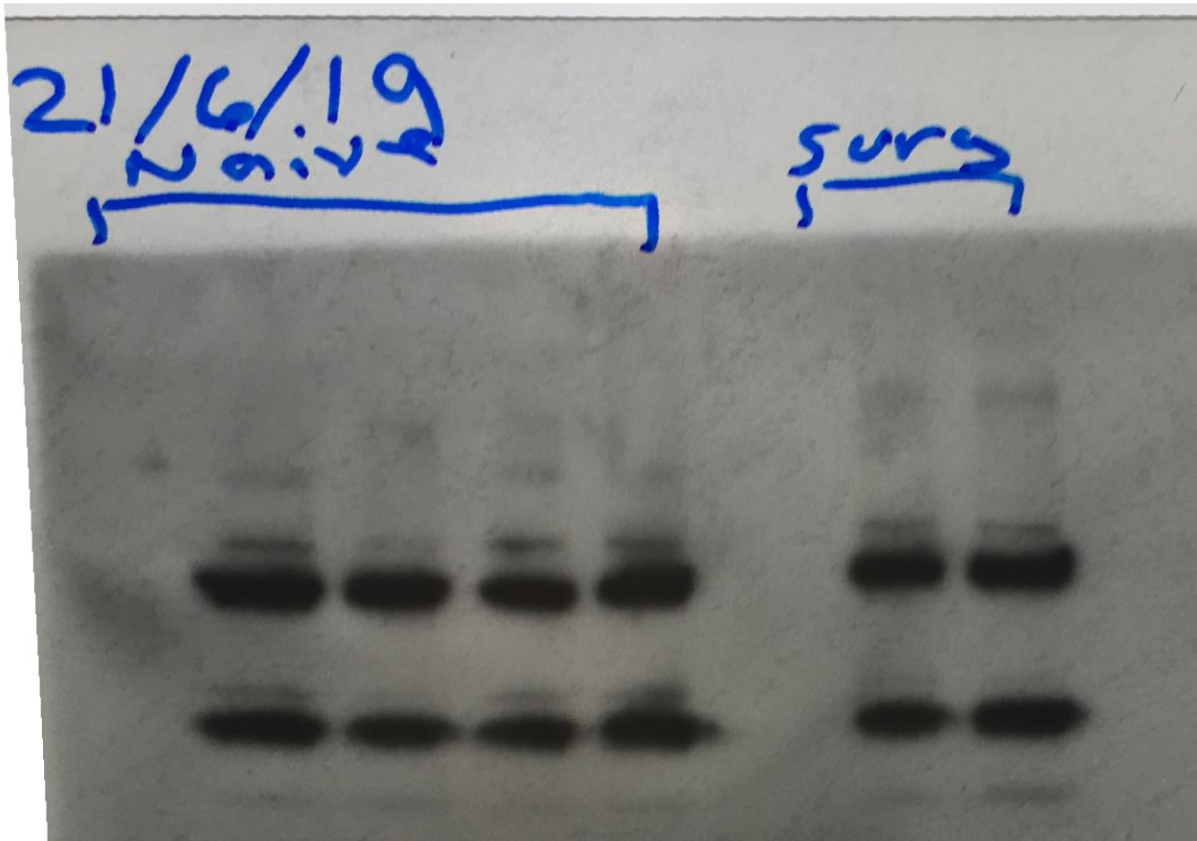



15. Supplementary Figure 11: IHC protocols for CD44 and ITGA6

| ITGA6              |                                                                                                                                                                               |           |                  |
|--------------------|-------------------------------------------------------------------------------------------------------------------------------------------------------------------------------|-----------|------------------|
| Control samples    | Positive and negative (without primary antibody) on normal human skin (PHN)<br>(picture below exported at x20 magnification from original scan)                               |           |                  |
| Post-fixation      | <input checked="" type="checkbox"/> Cold acetone                                                                                                                              | 10 min    | -20°C            |
| Blocking           | PBS 1X / BSA 3% / NGS 10%                                                                                                                                                     | 30 min    | Room Temperature |
| Primary antibody   | <input checked="" type="checkbox"/> Merck Millipore, MAB1378      Dilution: 1/50                                                                                              | Overnight | 4°C              |
| Secondary antibody | <input checked="" type="checkbox"/> Life Technologies, A-21434 [Goat anti-Rat IgG (H+L) Cross-Adsorbed Secondary Antibody, Alexa Fluor 555, Invitrogen™] ; Dilution(s): 1/500 | 1h        | Room Temperature |

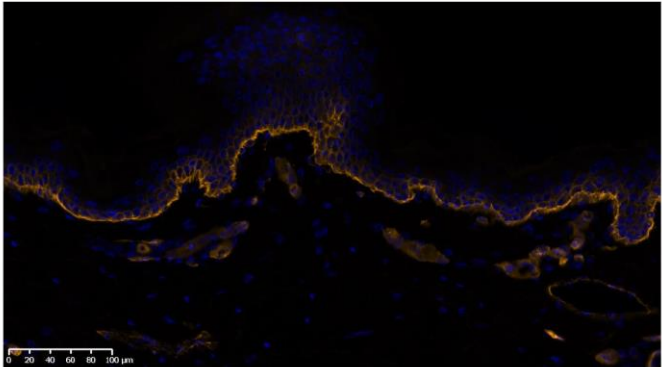

| CD44               |                                                                                                                                                                              |           |                  |
|--------------------|------------------------------------------------------------------------------------------------------------------------------------------------------------------------------|-----------|------------------|
| Control samples    | Positive and negative (without primary antibody) on normal human skin (PHN)<br>(picture below exported at x20 magnification from original scan)                              |           |                  |
| Post-fixation      | <input checked="" type="checkbox"/> Cold acetone                                                                                                                             | 10 min    | -20°C            |
| Blocking           | PBS 1X / BSA 3% / NGS 10%                                                                                                                                                    | 30 min    | Room Temperature |
| Primary antibody   | <input checked="" type="checkbox"/> Novocastra, BMS144      Dilution: 1/50                                                                                                   | Overnight | 4°C              |
| Secondary antibody | <input checked="" type="checkbox"/> Life Technologies, A-21422 [Goat anti-Mouse IgG (H+L) Cross-Adsorbed Secondary Antibody, Alexa Fluor 555, Invitrogen™] ; Dilution: 1/500 | 1h        | Room Temperature |

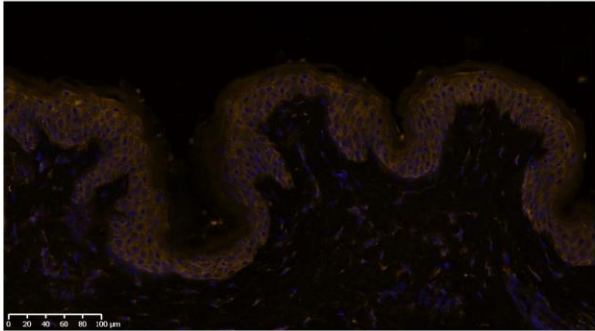

Supplement: Supplementary file [file 2020.08.25.20181859-1.pdf]
